# Supplementary material for: Applications of Life Cycle Assessment in the Chocolate Industry: A State-of-the-Art Analysis Based on Systematic Review
Source: MDPI journal article supplement (doi:10.3390/foods13060915), 2024-03-18
Supplement: s1 [file s1]

# Applications of Life Cycle Assessment in the Chocolate Industry: A State-of-the-Art Analysis Based on Systematic Review

## Supplementary Material

Shuhan Wang<sup>1</sup>, Yahong Dong<sup>1,2\*</sup>

<sup>1</sup> Macau Environmental Research Institute, Macau University of Science and Technology, Macao, China

<sup>2</sup> National Observation and Research Station of Coastal Ecological Environments in Macao, Macau University of Science and Technology, Macao, China

\* Correspondence: yhdong@must.edu.mo

**Table S1. The input data within the boundaries of the chocolate system.**

| Input data                  |                                      |      |                                                                                                                                                                                                                          |
|-----------------------------|--------------------------------------|------|--------------------------------------------------------------------------------------------------------------------------------------------------------------------------------------------------------------------------|
| Energy                      | Amount<br>(per kg chocolate product) | Unit | Data sources                                                                                                                                                                                                             |
| Electricity (trigeneration) | 0.42—0.91                            | kWh  | (Recanatia et al., 2018; Bianchi et al.,2021; Jeswani et al, 2015) [19,37,43]                                                                                                                                            |
| Heat (trigeneration)        | 0.47—0.64                            | kWh  | (Recanatia et al., 2018; Bianchi et al.,2021) [19,37]                                                                                                                                                                    |
| Cooling (trigeneration)     | 0.19—0.27                            | kWh  | (Recanatia et al., 2018; Bianchi et al.,2021) [19,37]                                                                                                                                                                    |
| Electricity (national grid) | 0.019                                | kWh  | (Recanatia et al., 2018) [19]                                                                                                                                                                                            |
| Natural gas (national grid) | 1.023—4.57                           | MJ   | (Recanatia et al., 2018; Bianchi et al.,2021; Jeswani et al, 2015) [19, 37,43]                                                                                                                                           |
| Electricity                 | 0.37—0.57                            | kWh  | (Konstantas et al., 2019a; Konstantas et al., 2019c) [44,35]                                                                                                                                                             |
| Energy                      | Amount<br>(per kg cocoa product)     | Unit | Data sources                                                                                                                                                                                                             |
| Electricity (national grid) | 0.088                                | kWh  | (Ntiamoah and Afrane, 2008) [61]                                                                                                                                                                                         |
| Electricity                 | 0.014                                | kWh  | (Leyte et al., 2017) [30]                                                                                                                                                                                                |
| Diesel                      | 53.14                                | g    | (Ntiamoah and Afrane, 2008) [61]                                                                                                                                                                                         |
| Petrol                      | 8.99                                 | g    | (Ntiamoah and Afrane, 2008) [61]                                                                                                                                                                                         |
| Materials                   | Amount<br>(per kg chocolate product) | Unit | Data sources                                                                                                                                                                                                             |
| Sugar                       | 102.2—520                            | g    | ( Recanatia et al., 2018; Boakye-Y et al., 2021; Bianchi et al.,2021; Miahab et al., 2018; Konstantas et al., 2019a; Konstantas et al., 2019b; Jeswani et al., 2015; Konstantas et al., 2019c) [19,28,37,36,44,42,43,35] |
| Milk powder                 | 0—300                                | g    | (Boakye-Y et al., 2021; Bianchi et al.,2021; Konstantas et al., 2019a; Konstantas et al., 2019c) [28,37,44,35]                                                                                                           |
| Flour                       | 21.71—115.6                          | g    | (Konstantas et al., 2018; Konstantas et al., 2019a; Jeswani et al., 2015; Konstantas et al., 2019c) [54,44,43,35]                                                                                                        |
| Butter                      | 2.38—2.4                             | g    | (Konstantas et al., 2018;Konstantas et al., 2019a) [54,44]                                                                                                                                                               |
| Starch                      | 21.71—23.4                           | g    | (Konstantas et al., 2018;Konstantas et al., 2019a) [54,44]                                                                                                                                                               |
| Packaging                   | 20—180.77                            | g    | (Recanatia et al., 2018; Konstantas et al., 2018; Neira, 2016; Bianchi et al., 2021) [19,54,55,37]                                                                                                                       |
| Aluminum Foil               | 6.6—39.8                             | g    | (Recanatia et al., 2018; Konstantas et al., 2018; Pérez-N et al., 2020; Neira, 2016; Boakye-Y et al., 2021; Miahab et al., 2018; Konstantas et al., 2019a; Crenna et al., 2019) [19,54,17,55,28,36,44,68]                |
| Cardboard                   | 33—137                               | g    | (Recanatia et al., 2018; Konstantas et al., 2018; Bianchi et al., 2021; Konstantas et al., 2019a; Crenna et al., 2019; Konstantas et al., 2019b; Konstantas et al., 2019c) [19,54,37,44,68,42,35]                        |
| Paper                       | 24.1—118                             | g    | (Pérez-N et al., 2020; Neira, 2016; Bianchi et al., 2021; Boakye-Y et al., 2021) [17,55,37,28]                                                                                                                           |

| Polypropylene      | 8.1—75                           | g    | (Bianchi et al., 2021; Miahab et al., 2018; Konstantas et al., 2019b; Konstantas et al., 2019c) [37,36,42,35] |
|--------------------|----------------------------------|------|---------------------------------------------------------------------------------------------------------------|
| Materials          | Amount<br>(per kg cocoa product) | Unit | Data sources                                                                                                  |
| Fertilizer N       | 58—222                           | g    | (Bianchi et al., 2021) [37]                                                                                   |
| Fertilizer P       | 14—175                           | g    | (Bianchi et al., 2021; Parra-P and Verburg, 2022; Crenna et al., 2019) [37,31,68]                             |
| Fertilizer K       | 26.27—164                        | g    | (Bianchi et al., 2021; Parra-P and Verburg, 2022; Crenna et al., 2019) [37,31,68]                             |
| Organic fertilizer | 15—21                            | g    | (Bianchi et al., 2021) [37]                                                                                   |
| Pesticide          | 8.23—40                          | g    | (Bianchi et al., 2021; Crenna et al., 2019) [37,68]                                                           |
| Diesel             | 11—67.6                          | g    | (Bianchi et al., 2021; Leyte et al., 2017) [37,30]                                                            |
| Petrol             | 0.019—0.024                      | L    | (Parra-P and Verburg, 2022) [31]                                                                              |

**Table S2. The output data within the boundaries of the chocolate system.**

| Output data                            |                                      |      |                                                                                       |
|----------------------------------------|--------------------------------------|------|---------------------------------------------------------------------------------------|
| Emissions to air                       |                                      |      |                                                                                       |
| Component                              | Amount<br>(per kg chocolate product) | Unit | Data sources                                                                          |
| CO <sub>2</sub>                        | 109                                  | g    | (Recanatia et al., 2018) [19]                                                         |
| VOCs                                   | 128.9                                | mg   | (Recanatia et al., 2018) [19]                                                         |
| PM <sub>10</sub> and PM <sub>2.5</sub> | 22.6                                 | mg   | (Recanatia et al., 2018) [19]                                                         |
| NOx                                    | 1                                    | g    | (Recanatia et al., 2018) [19]                                                         |
| CO                                     | 0.7                                  | g    | (Recanatia et al., 2018) [19]                                                         |
| Component                              | Amount<br>(per kg cocoa product)     | Unit | Data sources                                                                          |
| CO <sub>2</sub>                        | 44.11—237.9                          | g    | (Ntiamoah and Afrane, 2008; Leyte et al., 2017; Parra-P and Verburg, 2022) [61,30,31] |
| PM <sub>10</sub> and PM <sub>2.5</sub> | 2.5                                  | g    | (Ntiamoah and Afrane, 2008) [61]                                                      |
| NOx                                    | 0.08–0.18                            | g    | (Leyte et al., 2017; Parra-Pand Verburg, 2022) [30,31]                                |
| CO                                     | 0.018—8.41                           | g    | (Ntiamoah and Afrane, 2008; Leyte et al., 2017; Parra-P and Verburg, 2022) [61,30,31] |
| SO <sub>2</sub>                        | 0.001—8                              | g    | (Ntiamoah and Afrane, 2008; Leyte et al., 2017; Parra-P and Verburg, 2022) [61,30,31] |
| Heavy metals                           | 0.035                                | g    | (Ntiamoah and Afrane, 2008) [61]                                                      |
| Pesticides                             | 0.813                                | g    | (Ntiamoah and Afrane, 2008) [61]                                                      |
| NH <sub>3</sub>                        | 2.2—54                               | g    | (Bianchi et al., 2021) [37]                                                           |
| N <sub>2</sub> O                       | 0.01—3.5                             | g    | (Bianchi et al., 2021; Leyte et al., 2017; Parra-P and Verburg, 2022) [37,30,31]      |
| NO                                     | 0.4—1.6                              | g    | (Bianchi et al., 2021) [37]                                                           |
| CH <sub>4</sub>                        | 0.01—0.053                           | g    | (Leyte et al., 2017; Parra-P and Verburg, 2022) [30,31]                               |
| Emissions to water                     |                                      |      |                                                                                       |
| Component                              | Amount<br>(per kg chocolate product) | Unit | Data sources                                                                          |
| TSP                                    | 1.11                                 | g    | (Recanatia et al., 2018) [19]                                                         |
| BOD <sub>5</sub>                       | 1.35                                 | g    | (Recanatia et al., 2018) [19]                                                         |
| COD                                    | 3.25                                 | g    | (Recanatia et al., 2018) [19]                                                         |
| Oils                                   | 31.68                                | mg   | (Recanatia et al., 2018) [19]                                                         |
| SO <sub>4</sub> <sup>2-</sup>          | 53.97                                | mg   | (Recanatia et al., 2018) [19]                                                         |
| Cl <sup>-</sup>                        | 32.85                                | mg   | (Recanatia et al., 2018) [19]                                                         |
| F <sup>-</sup>                         | 9.5                                  | mg   | (Recanatia et al., 2018) [19]                                                         |
| NH <sub>4</sub>                        | 30.27                                | mg   | (Recanatia et al., 2018) [19]                                                         |
| Surfactant                             | 115.43                               | mg   | (Recanatia et al., 2018) [19]                                                         |
| N tot                                  | 84.48                                | mg   | (Recanatia et al., 2018) [19]                                                         |
| Component                              | Amount<br>(per kg cocoa product)     | Unit | Data sources                                                                          |
| Nitrates                               | 0.0175—0.0667                        | kg   | (Ntiamoah and Afrane, 2008; Bianchi et al., 2021) [61,37]                             |
| Phosphates                             | 0.0004—0.0027                        | kg   | (Ntiamoah and Afrane, 2008; Bianchi et al., 2021) [61,37]                             |
| Pesticide                              | 3.6880E-03                           | kg   | (Ntiamoah and Afrane, 2008) [61]                                                      |
| Heavy metals                           | 7.4761E-04                           | kg   | (Ntiamoah and Afrane, 2008) [61]                                                      |
| Emissions to soil                      |                                      |      |                                                                                       |
| Component                              | Amount<br>(per kg cocoa product)     | Unit | Data sources                                                                          |
| Pesticides                             | 9.4477E-04                           | kg   | (Ntiamoah and Afrane, 2008) [61]                                                      |
| Heavy metals                           | 4.1870E-05                           | kg   | (Ntiamoah and Afrane, 2008) [61]                                                      |
| Mancozeb                               | 0.0003—0.00556                       | kg   | (Leyte et al., 2017; Crenna et al., 2019) [30,68]                                     |
| By-products                            |                                      |      |                                                                                       |
| Component                              | Amount<br>(per kg cocoa product)     | Unit | Data sources                                                                          |
| Cocoa liquor                           | 319.48                               | g    | (Ntiamoah and Afrane, 2008) [61]                                                      |
| Cocoa butter                           | 231.25                               | g    | (Ntiamoah and Afrane, 2008) [61]                                                      |
| Cocoa powder                           | 75                                   | g    | (Ntiamoah and Afrane, 2008) [61]                                                      |
| Cocoa shells                           | 98                                   | g    | (Ntiamoah and Afrane, 2008) [61]                                                      |
| Cocoa cake                             | 268.75                               | g    | (Ntiamoah and Afrane, 2008) [61]                                                      |

**Table S3. Environmental impacts of 1 kg chocolate product.**

| Impact category          | Production | Manufacturing         | Packaging             | Transportation        | Distribution | Total                | Unit                                | Data source                                                                                                                                                                                                             |
|--------------------------|------------|-----------------------|-----------------------|-----------------------|--------------|----------------------|-------------------------------------|-------------------------------------------------------------------------------------------------------------------------------------------------------------------------------------------------------------------------|
| Global warming potential | 1.1        | 0.158—0.549           | 0.341-0.270           | 0.219—1.84            | 0.1          | 1.20—<br>4.21        | kg CO <sub>2</sub> eq               | (Recanatia et al., 2018; Pérez-N et al., 2020; Konstantas et al., 2020; Boakye-Y et al., 2021; Konstantas et al., 2019a; Konstantas et al., 2019b; Crenna et al., 2019) [19,17,79,28,44,42,68]                          |
| Ozone depletion          | 3.60E-07   | 2.69E-08—<br>6.89E-08 | 1.88E-08—<br>2.37E-08 | 4.14E-08—<br>5.32E-07 | 1.26E-08     | 8.3E-08—<br>5.5E-06  | kg CFC-11 eq                        | (Recanatia et al., 2018; Pérez-N et al., 2020; Konstantas et al., 2020; Boakye-Y et al., 2021; Konstantas et al., 2019a; Jeswani et al., 2015; Konstantas et al., 2019b; Crenna et al., 2019) [19,17,79,28,44,43,42,68] |
| Acidification            | 0.014      | 2.59E-04—<br>4.21E-03 | 1.70E-03—<br>2.15E-03 | 1.15E-03—<br>7.69E-03 | 7.66E-04     | 0.0054—<br>0.0264    | kg SO <sub>2</sub> eq               | (Recanatia et al., 2018; Pérez-N et al., 2020; Boakye-Y et al., 2021; Crenna et al., 2019) [19,17,28,68]                                                                                                                |
| Photochemical oxidation  | 2.70E-04   | 6.16E-05—<br>1.59E-04 | 1.08E-04—<br>1.36E-04 | 8.27E-05—<br>5.54E-04 | 2.89E-05     | 3.07E-04—<br>9.4E-03 | kg C <sub>2</sub> H <sub>4</sub> eq | (Recanatia et al., 2018; Pérez-N et al., 2020; Konstantas et al., 2020; Boakye-Y et al., 2021; Konstantas et al., 2019a; Jeswani et al., 2015; Konstantas et al., 2019b) [19,17,79,28,44,43,42]                         |
| Human toxicity           | -          | 0.198                 | 0.27                  | 0.166—1.12            | 0.0361       | 0.41—<br>1.81        | kg 1,4-DB eq                        | (Pérez-N et al., 2020; Konstantas et al., 2020; Boakye-Y et al., 2021; Konstantas et al., 2019a; Jeswani et al., 2015; Konstantas et al., 2019b) [17,79,28,44,43,42]                                                    |
| Terrestrial ecotoxicity  | -          | 1.78E-03              | 1.93E-03              | 9.36E-04—<br>6.32E-03 | 3.25E-04     | 2.60E-04—<br>0.0467  | kg 1,4-DB eq                        | (Pérez-N et al., 2020; Konstantas et al., 2020; Boakye-Y et al., 2021; Konstantas et al., 2019a; Konstantas et al., 2019b) [17,79,28,44,42]                                                                             |
| Eutrophication           | 0.0235     | 1.69E-04—<br>8.28E-04 | 4.68E-04—<br>5.91E-04 | 3.24E-04—<br>2.21E-03 | 1.51E-04     | 0.0017—<br>0.0255    | kg PO <sub>4</sub> <sup>3-</sup> eq | (Recanatia et al., 2018; Pérez-N et al., 2020; Boakye-Y et al., 2021; Jeswani et al., 2015) [19,17,28,43]                                                                                                               |

**Note: ‘-’: not available.**

**Table S4. Comparison of different types of chocolate product**

| <b>Category 1: Chocolate recipe</b>                    |                        |                |                       |                                                                                                                                                         |                                                                                                          |
|--------------------------------------------------------|------------------------|----------------|-----------------------|---------------------------------------------------------------------------------------------------------------------------------------------------------|----------------------------------------------------------------------------------------------------------|
| <b>Product type</b>                                    | <b>Impact category</b> | <b>Results</b> | <b>Unit</b>           | <b>System boundary</b>                                                                                                                                  | <b>Authors (year)</b>                                                                                    |
| Dark chocolate                                         | GWP                    | 2.1-2.62       | kg CO <sub>2</sub> eq | Whole life cycle; Whole life cycle except retail stage; Whole life cycle except waste management stage; Whole life cycle except waste management stage; | (Recanatia et al., 2018; Bianchi et al., 2021; Boakye-Y et al., 2021; Büsser et al., 2009) [19,37,28,49] |
| Milk chocolate                                         | GWP                    | 3.6-4.2        | kg CO <sub>2</sub> eq | Whole life cycle except retail stage; Whole life cycle except waste management stage; Whole life cycle except waste management stage                    | (Bianchi et al., 2021; Boakye-Y et al., 2021; Büsser et al., 2009) [37,28,49]                            |
| White chocolate                                        | GWP                    | 4.1            | kg CO <sub>2</sub> eq | Whole life cycle except retail stage; Whole life cycle except waste management stage                                                                    | (Bianchi et al., 2021; Büsser et al., 2009) [37,49]                                                      |
| Pure chocolate                                         | GWP                    | 2.57-4.15      | kg CO <sub>2</sub> eq | Whole life cycle; Whole life cycle except waste management stage                                                                                        | (Konstantas et al., 2018; Neira, 2016) [54,55]                                                           |
| Chocolate confectionery                                | GWP                    | 5.29-6.76      | kg CO <sub>2</sub> eq | Whole life cycle;                                                                                                                                       | (Miah et al., 2018) [36]                                                                                 |
| Chocolate biscuit                                      | GWP                    | 1.29-5         | kg CO <sub>2</sub> eq | Whole life cycle; Whole life cycle                                                                                                                      | (Miah et al., 2018; Konstantas et al., 2019a) [36,44]                                                    |
| Chocolate wafer                                        | GWP                    | 3.39           | kg CO <sub>2</sub> eq | Whole life cycle                                                                                                                                        | (Konstantas et al., 2018) [54]                                                                           |
| Chocolate icream                                       | GWP                    | 3.66-3.91      | kg CO <sub>2</sub> eq | Whole life cycle                                                                                                                                        | (Konstantas et al., 2019b) [42]                                                                          |
| Chocolate cereal and snack                             | GWP                    | 2.64           | kg CO <sub>2</sub> eq | Whole life cycle                                                                                                                                        | (Jeswani et al., 2015) [43]                                                                              |
| <b>Category 2: Manufacturing and packaging methods</b> |                        |                |                       |                                                                                                                                                         |                                                                                                          |
| <b>Product type</b>                                    | <b>Impact category</b> | <b>Results</b> | <b>Unit</b>           | <b>System boundary</b>                                                                                                                                  | <b>Authors (year)</b>                                                                                    |
| Moulded chocolate                                      | GWP                    | 4.15           | kg CO <sub>2</sub> eq | Whole life cycle                                                                                                                                        | (Konstantas et al., 2018) [54]                                                                           |
| Chocolate countlines                                   | GWP                    | 3.39           | kg CO <sub>2</sub> eq | Whole life cycle                                                                                                                                        | (Konstantas et al., 2018) [54]                                                                           |
| Chocolates in bags                                     | GWP                    | 2.91           | kg CO <sub>2</sub> eq | Whole life cycle                                                                                                                                        | (Konstantas et al., 2018) [54]                                                                           |
| <b>Category 3: Cultivation management approach</b>     |                        |                |                       |                                                                                                                                                         |                                                                                                          |
| <b>Product type</b>                                    | <b>Impact category</b> | <b>Results</b> | <b>Unit</b>           | <b>System boundary</b>                                                                                                                                  | <b>Authors (year)</b>                                                                                    |
| Traditional chocolate                                  | GWP                    | 2.57           | kg CO <sub>2</sub> eq | Whole life cycle except waste management stages                                                                                                         | (Neira, 2016) [55]                                                                                       |
| Technified chocolate                                   | GWP                    | 2.82           | kg CO <sub>2</sub> eq | Whole life cycle except waste management stages                                                                                                         | (Neira, 2016) [55]                                                                                       |

**Table S5.** Summary of research findings of reviewed articles.

| <b>Aim</b>                                                        | <b>Findings</b>                                                                                                                                                                                                                                                                                                                                                                                                                                                                                                                                                                                      |
|-------------------------------------------------------------------|------------------------------------------------------------------------------------------------------------------------------------------------------------------------------------------------------------------------------------------------------------------------------------------------------------------------------------------------------------------------------------------------------------------------------------------------------------------------------------------------------------------------------------------------------------------------------------------------------|
| <b>A1:<br/>Whole life cycle of chocolate</b>                      | <ul style="list-style-type: none"> <li>▪ A full life cycle evaluation is essential for the environmental impact assessment and sustainability development of chocolate products.</li> <li>▪ The raw material planting stage and the chocolate manufacturing stage contribute the most to the environmental impact.</li> <li>▪ The environmental impact of the transportation stage is minimal, but through each life cycle stage, the total environmental impact on chocolate cannot be ignored.</li> </ul>                                                                                          |
| <b>A2:<br/>Main environmental hotspots</b>                        | <ul style="list-style-type: none"> <li>▪ Cocoa derivatives as well as milk powder are the largest contributors to the production stage.</li> <li>▪ Energy consumption is the biggest environmental influencing factor in the manufacturing stage.</li> <li>▪ GWP is the hot spot influence analogy, in which the raw material composition has the largest proportion.</li> <li>▪ CED was the category where chocolate affecting the largest results.</li> </ul>                                                                                                                                      |
| <b>A3:<br/>Product comparison</b>                                 | <ul style="list-style-type: none"> <li>▪ According to the difference in the formula, milk chocolate has the greatest environmental impact, and dark chocolate has the lowest impact. Of all the chocolate products, chocolate confectionery makes the most significant contribution to the environmental impact.</li> <li>▪ Chocolate products produced under traditional farm management methods and the cocoa agroforestry system are more sustainable.</li> </ul>                                                                                                                                 |
| <b>A4:<br/>Comparison of designs</b>                              | <ul style="list-style-type: none"> <li>▪ Different designs of cocoa production management can produce different environmental impact results.</li> <li>▪ The design of cocoa production management includes: cacao agroforestry systems; conventionally managed systems; technified management systems; monocultures.</li> <li>▪ The weight of the impact of transportation is also different in different supply chain scenarios.</li> </ul>                                                                                                                                                        |
| <b>A5:<br/>Incomplete life-cycle environmental impact</b>         | <ul style="list-style-type: none"> <li>▪ Some of the literature focuses on the environmental impact of the planting stage of cocoa.</li> <li>▪ Due to the small proportion of the transportation stage, some literature ignores the impact caused by transportation.</li> <li>▪ Some literature ignores waste management or waste and by-products statistics due to missing data or too small numbers.</li> </ul>                                                                                                                                                                                    |
| <b>A6:<br/>New ways to combine with the life cycle assessment</b> | <ul style="list-style-type: none"> <li>▪ LCA method combining economic evaluation method and geographic information technology can obtain the environmental and economic benefits of chocolate products.</li> <li>▪ The use of Taguchi Loss Function measures the economic impact of a process deviation from production targets.</li> <li>▪ Shape files that calculate GWP100 can be analyzed using geospatial analysis and GIS.</li> <li>▪ Combine land use modeling such as CLUMondo model and spatial analysis such as GLOBIO-InVEST model to explain effects outside the farm level.</li> </ul> |
